# Supplementary material
Source: publisher site journal article supplement (https://www.dovepress.com/article/supplementary_file/613925/613925%20Supplementary%20Material.docx)
Supplement: Supplementary file 1 [file 613925%20Supplementary%20Material.docx]

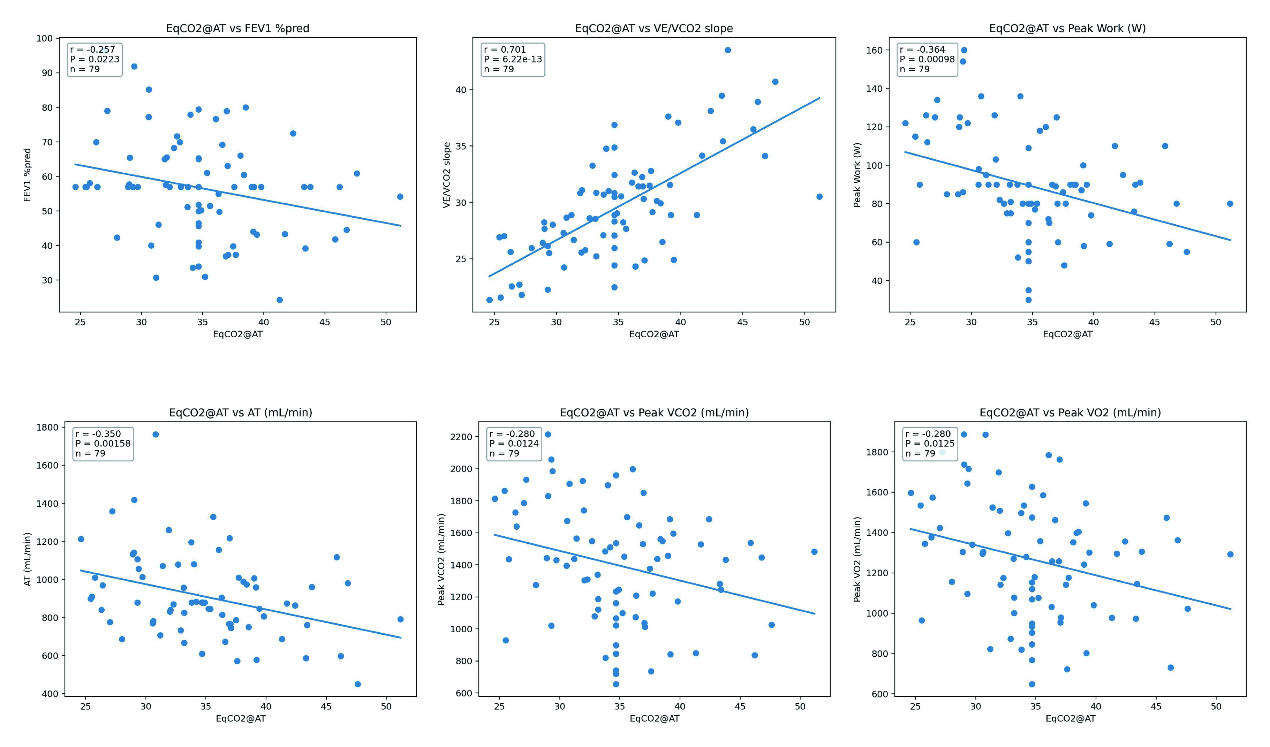
Supplementary Figure S1

Scatter plots showing correlations between EqCO₂@AT and selected pulmonary function and CPET parameters, including FEV₁% predicted, peak work rate, anaerobic threshold (AT), peak carbon dioxide output (Peak VCO₂), peak oxygen uptake (Peak VO₂), and VE/VCO₂ slope. Pearson correlation coefficients (r) and corresponding P values are shown in each panel.
